# Supplementary material for: Streptolysin O and NAD-Glycohydrolase Prevent Phagolysosome Acidification and Promote Group A Streptococcus Survival in Macrophages
Source: PubMed Central journal article supplement — mBio. 2014 Sep 16;5(5):e01690-14. doi: 10.1128/mBio.01690-14 (PMC4172074; doi:10.1128/mbio.01690-14), 2014-09-16
Supplement: mbo005141990sf1.pdf [file mbo005141990sf1.pdf]

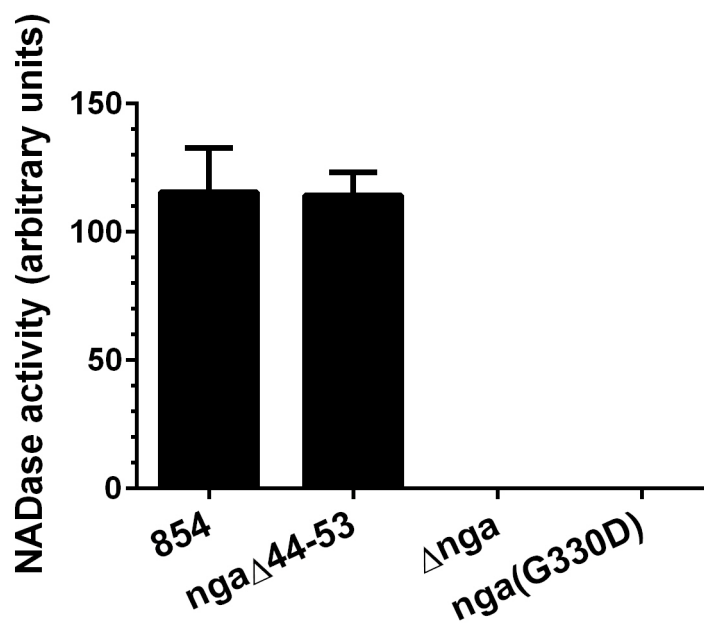

**Supplemental Figure 1. NADase translocation mutant *nga*Δ44-53 secretes the same amount of NADase activity as wild-type strain 854.** Values represent mean +/- standard error of NADase activity in culture supernatants from the indicated strains. No activity was detected in supernatants from the NADase deletion mutant Δ*nga* or the enzymatically inactive *nga*(G330D).
